# Supplementary material
Source: HighWire-hosted journal article supplement (http://www.qdcxjkg.com/highwire/filestream/113753/field_highwire_adjunct_files/0/ERJ-01378-2012_Disclosures.pdf)
Supplement: ERJ-01378-2012_Disclosures.pdf [file ERJ-01378-2012_Disclosures.pdf]

P. Ernst has received speaker fees and has attended advisory boards for AstraZeneca, Boehringer Ingelheim, GlaxoSmithKline, Merck, Novartis, and Nycomed all prior to January 2012.

S. Suissa has received research grants from AstraZeneca, Boehringer Ingelheim and GlaxoSmithKline, and has participated in advisory board meetings and as speaker at conferences for AstraZeneca, Boehringer-Ingelheim, GlaxoSmithKline, Novartis, Pfizer and Merck.
